# Supplementary material for: Intracellular Delivery of Proteins via Fusion Peptides in Intact Plants
Source: PLOS journal article supplement (doi:10.1371/journal.pone.0154081), 2016-04-21
Supplement: S12 (10.1371/journal.pone.0154081.s012) [file journal.pone.0154081.s012]

**S5 Table. Comparison between non-covalent protein transduction (electrostatic interaction) and covalent protein transduction.**

| <b>Criteria</b>                                        | <b>Non-covalent strategy<br/>(electrostatic interaction)</b>                                                                  | <b>Covalent Strategy</b>                                              |
|--------------------------------------------------------|-------------------------------------------------------------------------------------------------------------------------------|-----------------------------------------------------------------------|
| Preparation method                                     | Simple and rapid (30 mins)                                                                                                    | Time consuming and laborious<br>(Few days)                            |
| Preservation of biological activity of protein cargoes | Yes                                                                                                                           | Potentially inhibit biological activity of protein cargoes.           |
| Protein delivery efficiency                            | Not very high<br>(12.6% in this study)                                                                                        | No reports on intact plants.                                          |
| Versatile tool                                         | Yes. Carrier peptide can be mixed directly with various protein cargoes of opposite charge to form peptide/protein complexes. | No. Customization is required for each type of peptide-fusion protein |
